# Supplementary material
Source: publisher site journal article supplement (https://jor.pensoft.net/article/50039/download/suppl/31/)
Supplement: Supplementary file 1

Historical recordings by Richard D. Alexander in Mexico, 1965. Notes provided by Thomas Moore, Professor Emeritus, University of Michigan, Museum of Zoology. These tapes could not be located at the time of publication of this paper. Tape reel numbers are in bold font.

**2076** RDA65(4) 29 May 1965, stop 5, south of Cd. Victoria, [Tamaulipas], Mex., "slow grouped fultoni, collected" [appears to be reel #4 from this trip.] ["more cicadas" near end of tape, but now near Cd. Mante near end of tape [Tamaulipas], Mex.]

**2081** RDA65(9) 1 June 1965, "E of Cd. Maiz, (30 mi. E) [San Luis Potosi (central Mex.)], afternoon at start." "O. fultoni in middle of tape," "O. varicornis" near end of tape. Several cicadas, including "Zammara" near start. [Digitized by Tom Moore and Paulo Fonseca in 2005 as reel # 336.]

**2083** RDA65(11) 1 June 1965, ~30 mi. E of Cd. Maiz, [Est. San Luis Potosi], Mex., 70 deg. F, #2, O. fultoni (fast); later, "2 June 1965, Rd. to Rio Verde, " [Est. San Luis Potosi, Mex.], 60 deg. F."

**2088** RDA65(16) 4 June 1965, Huachinango, [Est. Puebla], Mex., " #2, Oecanthus trills;...#3, cicadas, (& laughing humans);...#6, trill (Oecanthus ?); #7, break trills; #8, slow fultoni (not grouped ?); ...#13, burst Oecanthus in tree + a series of lisps by Scudderia...."

**2095** RDA65(23) 11 June 1965, W of Guadalajara, [Est. Jalisco], 98 deg. F., cicada, big, pruinose, abdomen damaged. Then "#2, Santa Cruz, [Est. Oaxaca] ; ...#3, Oecanthus varicornis, 81 deg. F.; ...#4, ? irregular broken trill (smaller beast); ...#7, Oecanthus varicornis; ...# 9, sputter of trills [went in motel]; ...#17, fast fultoni, 80 deg, F.; .... " [Digitized by Tom Moore and Paulo Fonseca in 2005 as reel # 341.]

**2098** RDA65(26) 12 June 1965, Tepic, [Est. Nayarit], Mex., beginning in motel, 78 deg. F., recordings and observations of several species from various locations, about 19 cuts, "#7, Jalcocotan, O. fultoni, 63 deg. F., [Est. Nayarit]; #8, short trill Oecanthus; ...#10, poor, incl. fast fultoni; ...#12, O. varicornis; ...#14, chorus; #15, burst trillers; #16, burst trill Oecanthus; ...#18, O. varicornis; ...."
